# Supplementary material for: Quantitative analysis of air-oxidation reactions of thiolate-protected gold nanoclusters
Source: Royal Society of Chemistry journal article supplement (doi:10.1039/d4sc02995j), 2024-01-01
Supplement: d4sc02995j1.pdf [file d4sc02995j1.pdf]

## Electronic Supplementary Information

for

### Quantitative analysis of air-oxidation reactions of thiolate-protected gold nanoclusters

Wataru Suzuki,<sup>a†</sup> Ryo Takahata,<sup>a,b</sup> Yoshiyuki Mizuhata,<sup>a,b,c</sup> Norihiro Tokitoh,<sup>a,b,c</sup>

Songlin Xue<sup>d</sup> and Toshiharu Teranishi<sup>\*a,b</sup>

<sup>a</sup> *Institute for Chemical Research, Kyoto University, Gokasho, Uji, Kyoto 611-0011, Japan*

<sup>b</sup> *Graduate School of Science, Kyoto University, Gokasho, Uji, Kyoto 611-0011, Japan*

<sup>c</sup> *Integrated Research Consortium on Chemical Sciences, Uji, Kyoto 611-0011, Japan*

<sup>d</sup> *School of Chemistry and Chemical Engineering, Jiangsu University, 301 Xuefu Road, Zhenjiang 212013, China*

<sup>†</sup> *Present address: University of Hyogo, Himeji, Hyogo 671-2280, Japan*

*E-mail: teranisi@scl.kyoto-u.ac.jp; Fax: +81-774-38-3121*

## **Contents**

|                                                      |              |
|------------------------------------------------------|--------------|
| 1. Experimental section (Synthesis and Measurements) | Pages S3–S6  |
| 2. Figures S1–S20 and Tables S1–S3                   | Pages S7–S29 |
| 3. References                                        | Page S30     |

## Experimental Section

### Materials

**General.** Organic solvents, starting materials and reagents for synthesis were purchased from commercial sources and used without further purification.  $\text{TOA}^+[\text{Au}_{25}(\text{SC}_2\text{Ph})_{18}]^-$  ( $\text{SC}_2\text{Ph}$  = phenylethanethiolate,  $\text{TOA}^+$  = tetraoctylammonium),<sup>1</sup> and  $\text{TOA}^+[\text{Au}_{23}(\text{SCy})_{16}]^-$  ( $\text{SCy}$  = cyclohexanethiolate)<sup>2</sup> were synthesized according to the previous reports.

### Synthesis

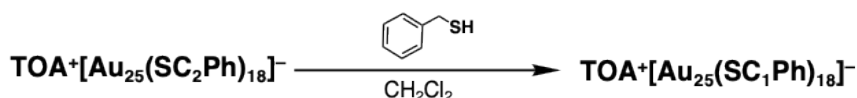

$\text{TOA}^+[\text{Au}_{25}(\text{SC}_1\text{Ph})_{18}]^-$ . Benzyl mercaptan ( $\text{PhC}_1\text{SH}$ , 1.8 mL, 1.9 g, 15 mmol) was added to a solution of  $\text{TOA}^+[\text{Au}_{25}(\text{SC}_2\text{Ph})_{18}]^-$  (30.0 mg, 3.82  $\mu\text{mol}$ ) in  $\text{CH}_2\text{Cl}_2$  (6 mL) and the solution was stirred for 1 h at 313 K. Progress of the reaction was monitored using UV–vis spectroscopy. After the reaction, MeOH (~40 mL) was added and the mixture was centrifuged (9600 g, 10 min) to precipitate the targeted clusters. The precipitate was collected and washed with MeOH to afford  $\text{TOA}^+[\text{Au}_{25}(\text{SC}_1\text{Ph})_{18}]^-$  (20.0 mg, 2.63  $\mu\text{mol}$ ) in 69% yield.

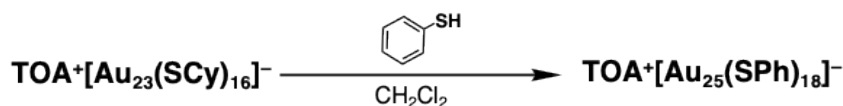

$\text{TOA}^+[\text{Au}_{25}(\text{SPh})_{18}]^-$ . Benzenethiol ( $\text{PhSH}$ , 0.80 mL, 0.86 g, 7.8 mmol) was added to the solution of  $\text{TOA}^+[\text{Au}_{23}(\text{SCy})_{16}]^-$  (18.7 mg, 2.73  $\mu\text{mol}$ ) in  $\text{CH}_2\text{Cl}_2$  (4 mL) and the solution was stirred overnight at 298 K. Progress of the reaction was monitored using UV–vis spectroscopy. After the reaction, MeOH (~25 mL) was added and the mixture was centrifuged (9600 g, 5 min) to precipitate impurities. The supernatant was concentrated to a small volume and centrifuged (9600 g, 10 min) to precipitate the targeted clusters. The precipitate was collected and washed with MeOH to afford  $\text{TOA}^+[\text{Au}_{25}(\text{SPh})_{18}]^-$  (10.4 mg, 1.41  $\mu\text{mol}$ ) in 56% yield.

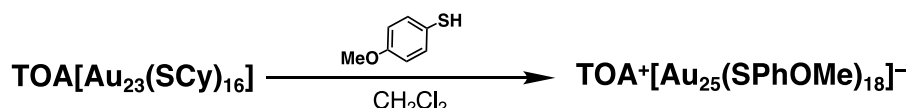

$\text{TOA}^+[\text{Au}_{25}(\text{SPhOMe})_{18}]^-$ . 4-Methoxybenzenethiol ( $\text{MeOPhSH}$ , 0.75 mL, 0.85 g, 6.1 mmol) was added to the solution of  $\text{TOA}^+[\text{Au}_{23}(\text{SCy})_{16}]^-$  (17.5 mg, 2.56  $\mu\text{mol}$ ) in  $\text{CH}_2\text{Cl}_2$  (3 mL) and

the solution was stirred for 1.5 h at 313 K. Progress of the reaction was monitored using UV–vis spectroscopy. After the reaction, MeOH (~25 mL) was added and the mixture was centrifuged (9600 g, 5 min) to precipitate impurities. The supernatant was concentrated to a small volume and centrifuged (9600 g, 10 min) to precipitate the targeted clusters. The precipitate was collected and washed with MeOH to afford  $\text{TOA}^+[\text{Au}_{25}(\text{SPhOMe})_{18}]^-$  (7.5 mg, 0.94  $\mu\text{mol}$ ) in 37% yield.

## Measurements

**X-ray Crystallography.** Single crystals of  $\text{TOA}^+[\text{Au}_{25}(\text{SPh})_{18}]^-$  were grown by recrystallization with a vapour diffusion of EtOH into the toluene solution of  $\text{TOA}^+[\text{Au}_{25}(\text{SPh})_{18}]^-$ . The single crystals were mounted using a mounting loop. The intensity data were collected at 90 K on a Bruker D8 VENTURE system (PHOTONIII 14 with  $\text{I}\mu\text{S}$  Diamond) using Mo  $\text{K}\alpha$  radiation ( $\lambda = 0.71073 \text{ \AA}$ ). The structure was solved using SHELXT-2018/2<sup>3</sup> and refined by least-squares calculations on  $F^2$  for all reflections (SHELXL-2019/3).<sup>4</sup> All non-hydrogen atoms were refined anisotropically. All calculations were performed using Yadokari-XG 2011 software package<sup>5</sup> and Olex2-1.5.<sup>6</sup> In the CheckCIF report, several level B alerts are noted as below, which are derived from the severe disorders on the long alkyl chains and a number of positive residual densities remained around the cluster core. These are considered unavoidable due to the nature of the skeleton and measurements. The crystallographic data and a summary of the solution and refinement are given in Table S3. Supplementary crystallographic data of is available from the Cambridge Crystallographic Data Centre as CCDC-2299526.

## Alert level B

PLAT241\_ALERT\_2\_B High 'MainMol' Ueq as Compared to Neighbors of C155 Check

PLAT241\_ALERT\_2\_B High 'MainMol' Ueq as Compared to Neighbors of C158 Check

PLAT241\_ALERT\_2\_B High 'MainMol' Ueq as Compared to Neighbors of C160 Check

PLAT241\_ALERT\_2\_B High 'MainMol' Ueq as Compared to Neighbors of C163 Check

PLAT242\_ALERT\_2\_B Low 'MainMol' Ueq as Compared to Neighbors of C159 Check

PLAT242\_ALERT\_2\_B Low 'MainMol' Ueq as Compared to Neighbors of C161 Check

**Response:** These are derived from the disorders on the octyl substituent. It was difficult to separate

the disordered parts in an appropriate form.

PLAT420\_ALERT\_2\_B D-H Bond Without Acceptor O1 --H1 . Please Check

**Response:** Phenyl ring (C13-C18) accepts the OH with OH– $\pi$  interaction.

PLAT910\_ALERT\_3\_B Missing # of FCF Reflection(s) Below Theta(Min). 12 Note

**Response:** This is probably due to the large unit cell.

PLAT971\_ALERT\_2\_B Check Calcd Resid. Dens. 0.79Ang From Au19 2.60 eA-3

PLAT971\_ALERT\_2\_B Check Calcd Resid. Dens. 0.94Ang From S11 2.55 eA-3

PLAT971\_ALERT\_2\_B Check Calcd Resid. Dens. 0.74Ang From Au20 2.52 eA-3

PLAT973\_ALERT\_2\_B Check Calcd Positive Resid. Density on Au1 1.61 eA-3

PLAT973\_ALERT\_2\_B Check Calcd Positive Resid. Density on Au25 1.56 eA-3

PLAT973\_ALERT\_2\_B Check Calcd Positive Resid. Density on Au6 1.55 eA-3

**Response:** These are the residual densities near heavy atom core.

**Spectroscopic and Spectrometric Measurements.** UV–vis–NIR measurements were performed on a V-750 spectrophotometer from JASCO Corporation. The cell length of the quartz cuvette was 10 mm.  $^1\text{H}$  NMR spectra were measured on JEOL JNM-ECA600 and JNM-ECA400 spectrometers. For  $^1\text{H}$  NMR measurements, the solvent residual signal was used as the internal standard in acetone- $d_6$  or THF- $d_8$ . Negative-mode ESI–MS spectra in MeCN were measured on a Solarix-JA spectrometer. The concentration of  $\text{O}_2$  was controlled by changing the ratio of bubbled gas of  $\text{O}_2$ , air and  $\text{N}_2$ .<sup>7</sup>

**Electrochemical Measurements.** Cyclic voltammetric and differential pulse voltammetric measurements were carried out in THF containing 0.1 M TBAPF<sub>6</sub> as an electrolyte at room temperature under Ar. All measurements were made using a BAS ALS-730E electrochemical analyser with a glassy carbon electrode as a working electrode, a platinum wire as a counter electrode and Ag/AgNO<sub>3</sub> as a reference electrode. All redox potentials were determined relative to that of Fc/Fc<sup>+</sup> as 0 V and converted into the redox potential relative to that of SCE.<sup>8</sup>

**X-ray absorption fine structure measurements.** The Au  $L_3$ -edge X-ray absorption fine structure (XAFS) measurements were conducted at beamline BL01B1 of the SPring-8 facility of the Japan Synchrotron Radiation Research Institute (JASRI). The incident X-ray beam was monochromatized by a Si(111) double-crystal monochromator. As a reference, Au foil was measured in transmission mode using ionization chambers at room temperature. XAFS spectra of Au<sub>25</sub> cluster anions were measured in transmission mode at 10 K using ionization chambers as detectors. The X-ray energies were calibrated using Pt foil. Obtained EXAFS spectra were analysed using the xTunes program.<sup>9</sup> The  $k^3$ -weighted EXAFS spectra in the  $k$  range 3.0–20.0 Å<sup>-1</sup> for the Au- $L_3$  edge were Fourier transformed into  $r$  space for structural analysis. The curve-fitting analysis was conducted in the range of 1.5–3.3 Å for the Au- $L_3$  edge. In the curve-fitting analysis, the phase shifts and backscattering amplitude function of Au–Au, and Au–S were calculated using the FEFF8.5L program.

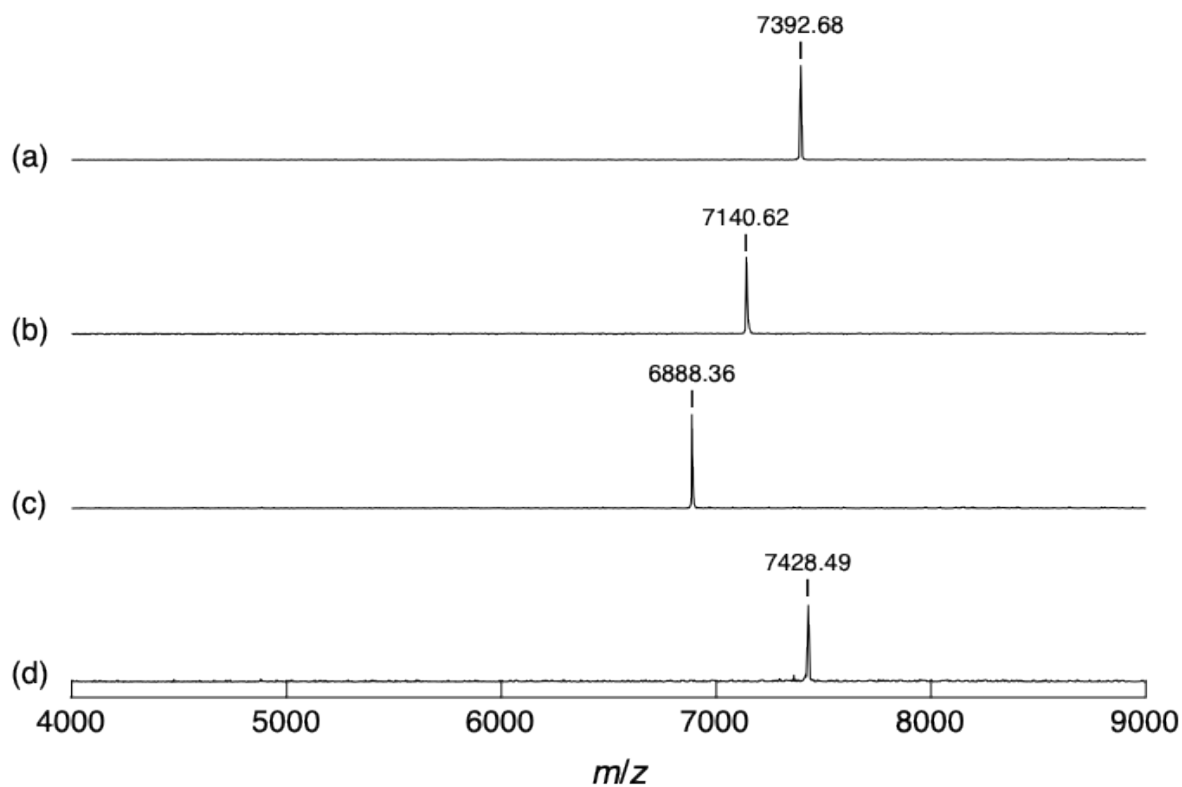

**Fig. S1.** Negative-mode ESI-MS spectra of  $\text{TOA}^+[\text{Au}_{25}(\text{SR})_{18}]^-$  in MeCN. **SR** = (a) **SC<sub>2</sub>Ph** (calcd.  $m/z$  = 7392.90), (b) **SC<sub>1</sub>Ph** (calcd.  $m/z$  = 7140.66), (c) **SPh** (calcd.  $m/z$  = 6888.38) and (d) **SPhOMe** (calcd.  $m/z$  = 7428.53).

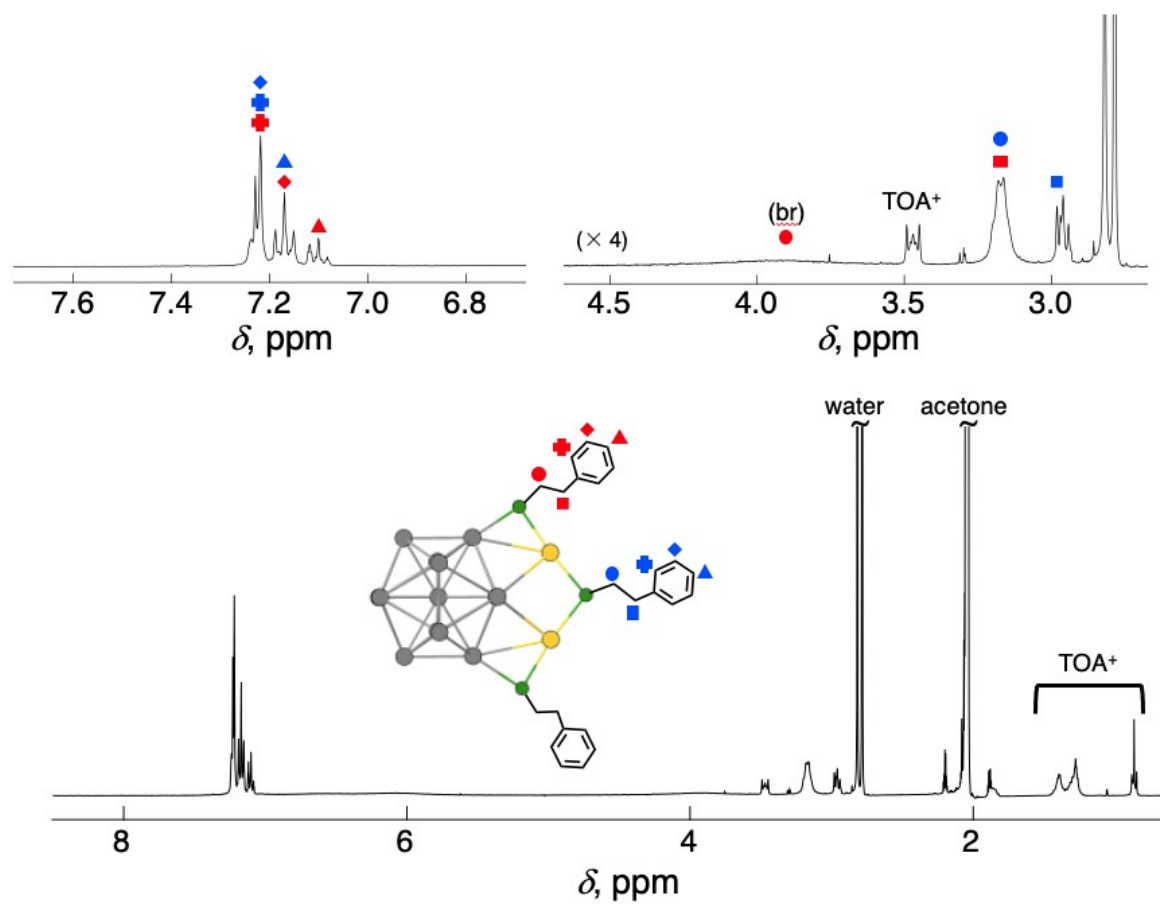

**Fig. S2.**  $^1\text{H}$  NMR spectra of  $\text{TOA}^+[\text{Au}_{25}(\text{SC}_2\text{Ph})_{18}]^-$  in  $\text{acetone-}d_6$ .

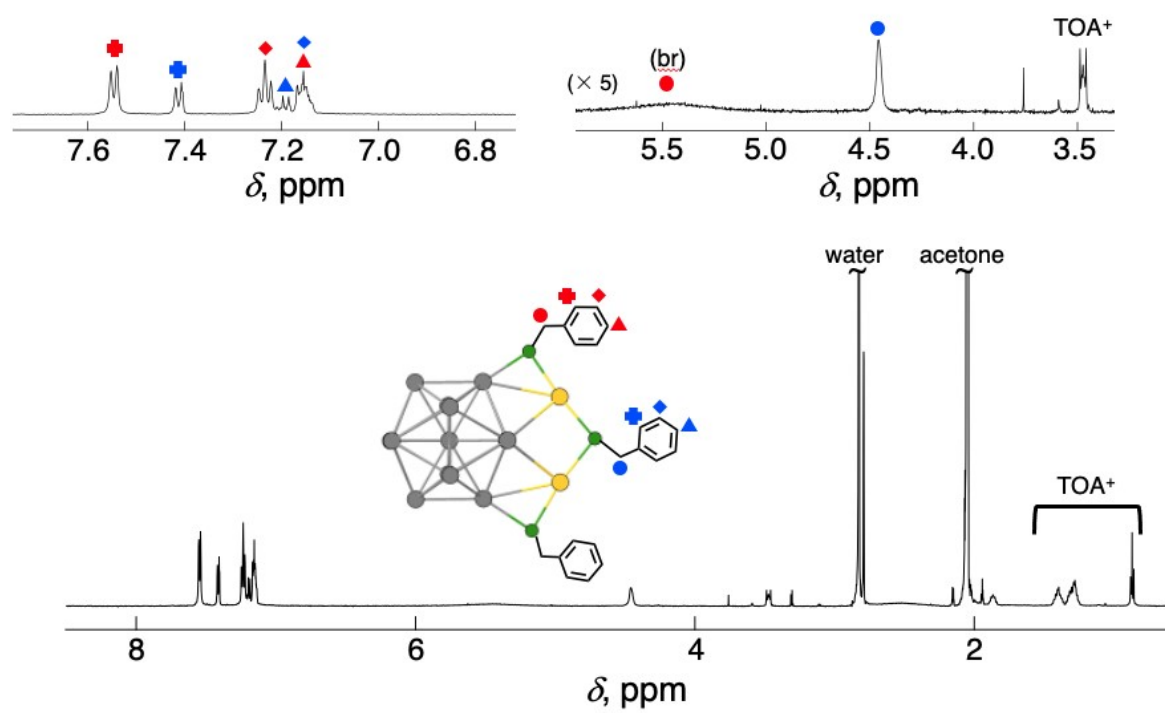

**Fig. S3.**  $^1\text{H}$  NMR spectra of  $\text{TOA}^+[\text{Au}_{25}(\text{SC}_1\text{Ph})_{18}]^-$  in  $\text{acetone-}d_6$ .

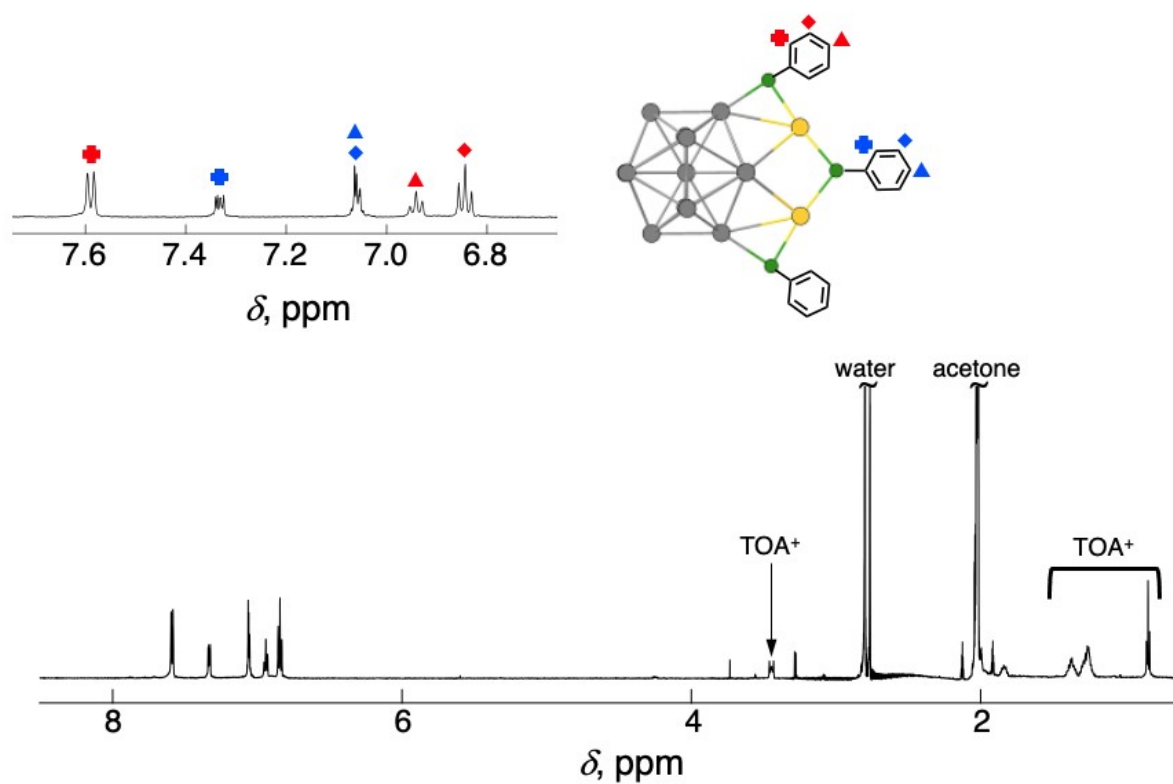

**Fig. S4.**  $^1\text{H}$  NMR spectra of  $\text{TOA}^+[\text{Au}_{25}(\text{SPh})_{18}]^-$  in  $\text{acetone-}d_6$ .

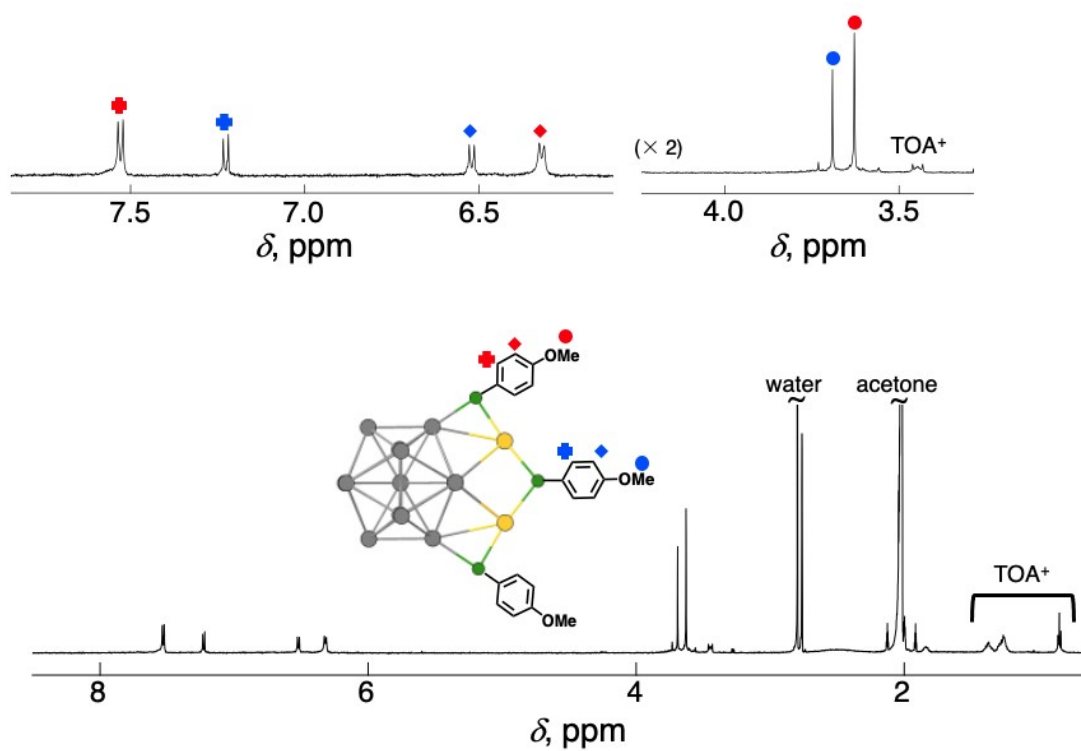

**Fig. S5.**  $^1\text{H}$  NMR spectra of  $\text{TOA}^+[\text{Au}_{25}(\text{SPhOMe})_{18}]^-$  in  $\text{acetone-}d_6$ .

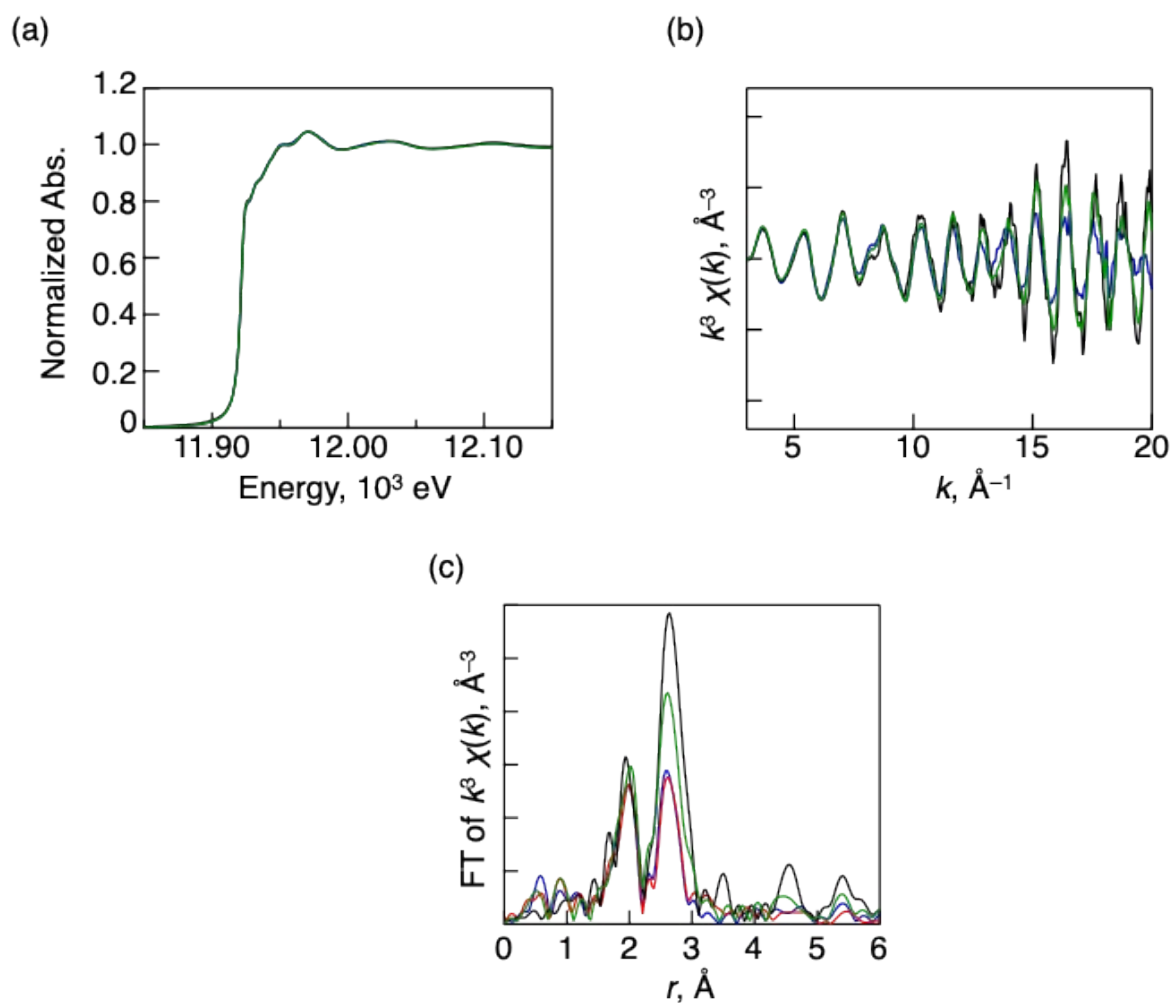

**Fig. S6.** (a) Au- $L_3$  edge XANES spectra, (b) EXAFS oscillation, and (c) Fourier-transformed EXAFS spectra of  $\text{TOA}^+[\text{Au}_{25}(\text{SR})_{18}]^-$ . SR =  $\text{SC}_2\text{Ph}$  (black),  $\text{SC}_1\text{Ph}$  (green),  $\text{SPh}$  (blue), and  $\text{SPhOMe}$  (red). Spectroscopic measurements were conducted at 10 K in transmission mode. It should be noted that the XANES spectra of  $\text{TOA}^+[\text{Au}_{25}(\text{SR})_{18}]^-$  were almost overlapped in (a).

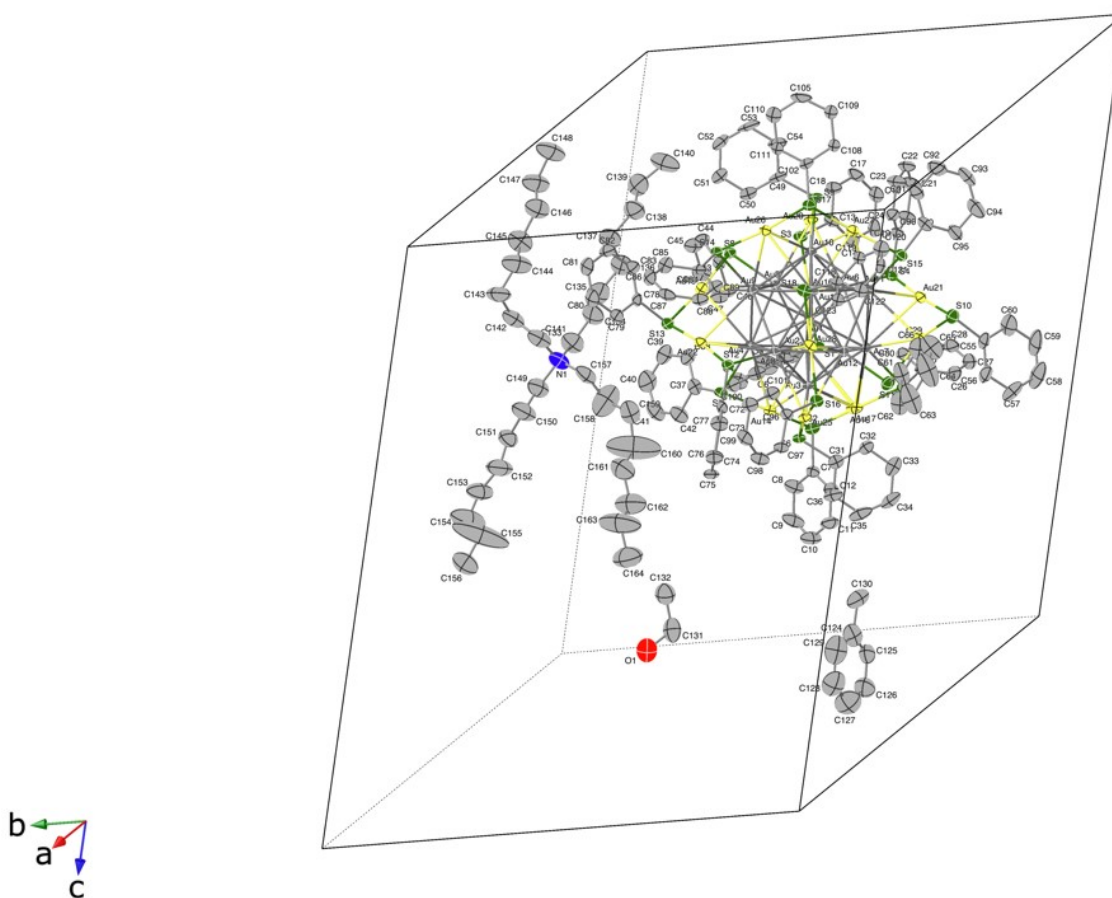

**Fig. S7.** Unit structure of  $\text{TOA}^+[\text{Au}_{25}(\text{SPh})_{18}]^-$  with thermal ellipsoids (50% probability). Hydrogen atoms were omitted for clarity.

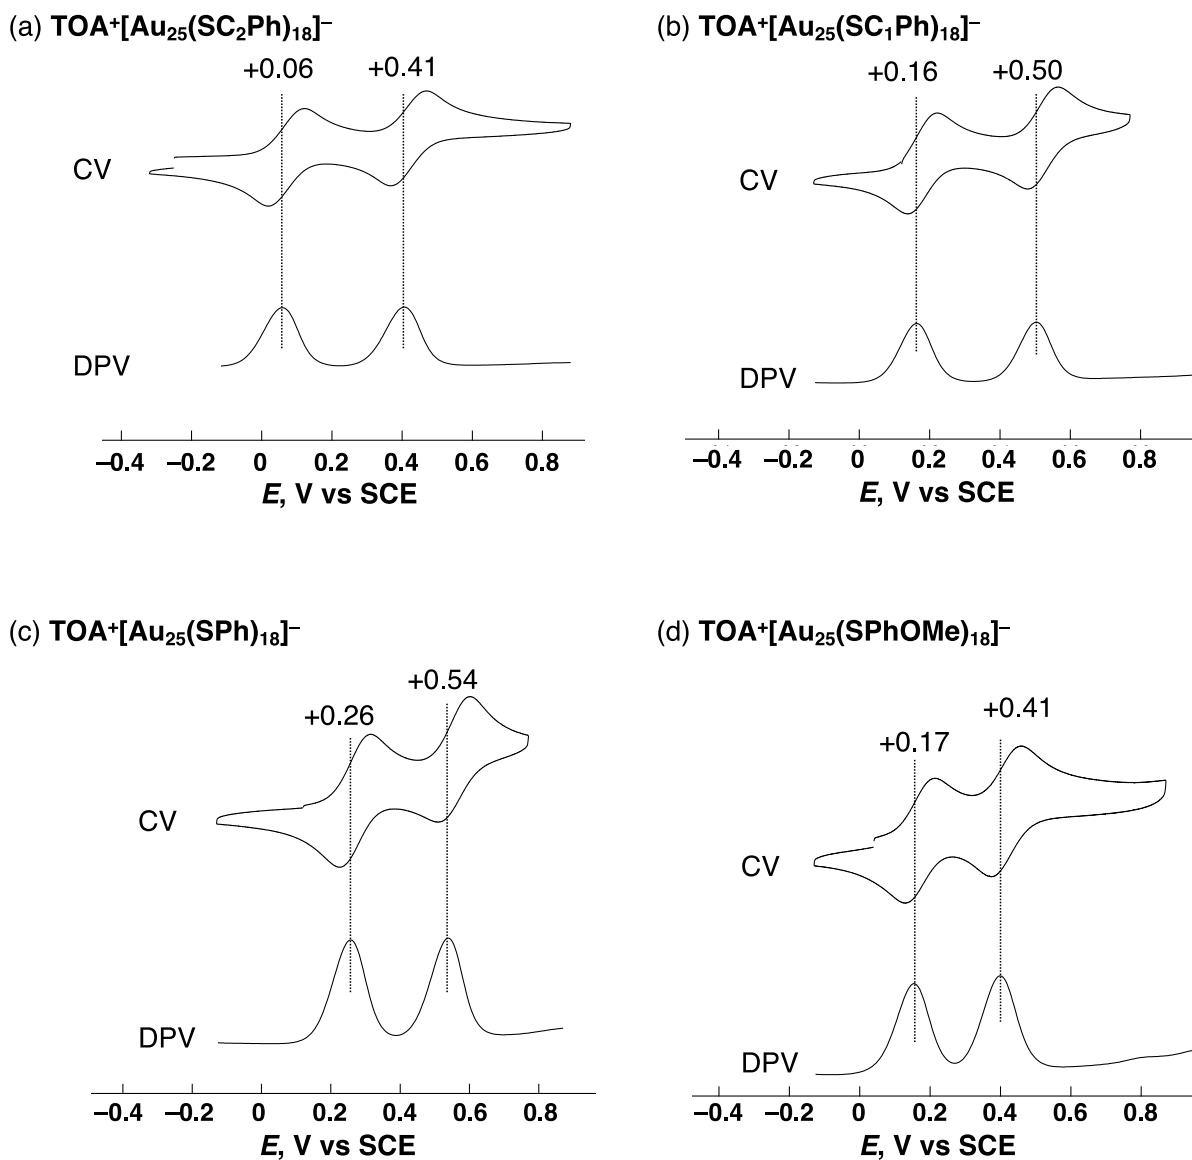

**Fig. S8.** Cyclic voltammograms (CV) and differential pulse voltammograms (DPV) of  $\text{TOA}^+[\text{Au}_{25}(\text{SR})_{18}]^-$  in THF containing 0.1 M TBAPF<sub>6</sub> as an electrolyte. **SR** = (a) **SC<sub>2</sub>Ph** (0.26 mM), (b) **SC<sub>1</sub>Ph** (0.37 mM), (c) **SPh** (0.41 mM) and (d) **SPhOMe** (0.25 mM).

(a)  $\text{TOA}^+[\text{Au}_{25}(\text{SC}_2\text{Ph})_{18}]^-$

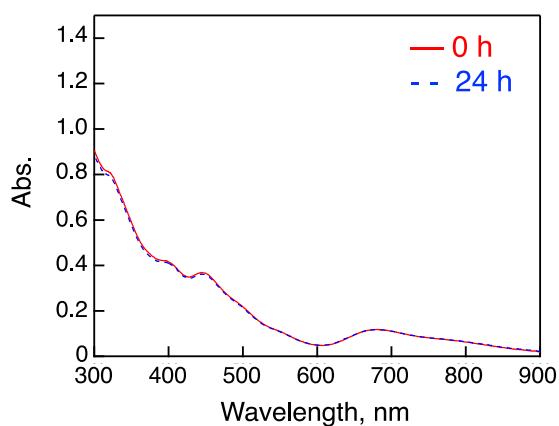

(b)  $\text{TOA}^+[\text{Au}_{25}(\text{SC}_1\text{Ph})_{18}]^-$

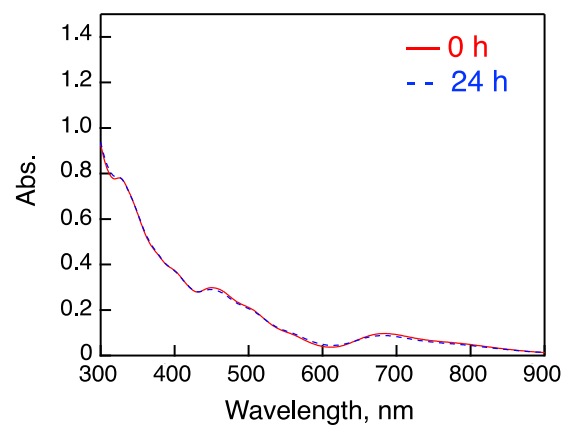

(c)  $\text{TOA}^+[\text{Au}_{25}(\text{SPh})_{18}]^-$

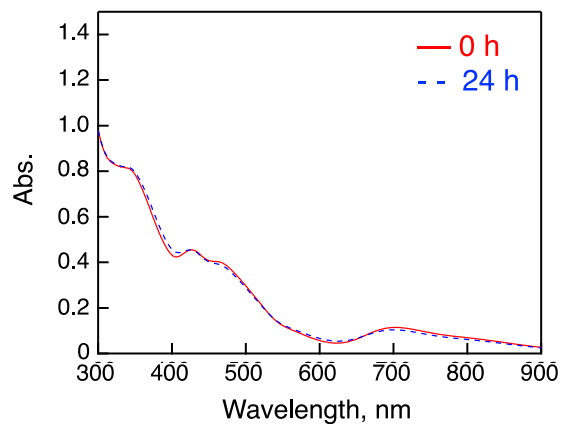

(d)  $\text{TOA}^+[\text{Au}_{25}(\text{SPhOMe})_{18}]^-$

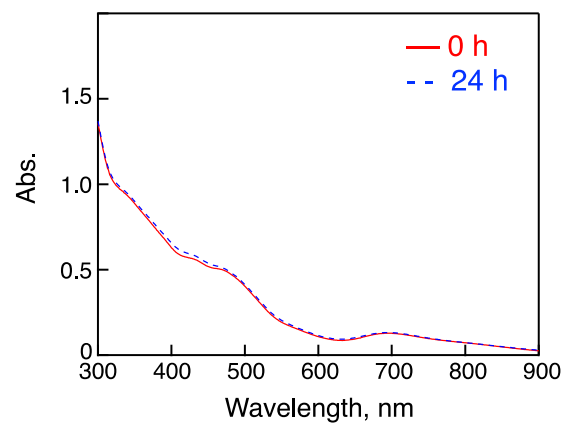

**Fig. S9.** UV-vis spectral changes of  $\text{TOA}^+[\text{Au}_{25}(\text{SR})_{18}]^-$  (0.010 mM) in THF under air at 298 K. SR = (a)  $\text{SC}_2\text{Ph}$ , (b)  $\text{SC}_1\text{Ph}$ , (c)  $\text{SPh}$  and (d)  $\text{SPhOMe}$ .

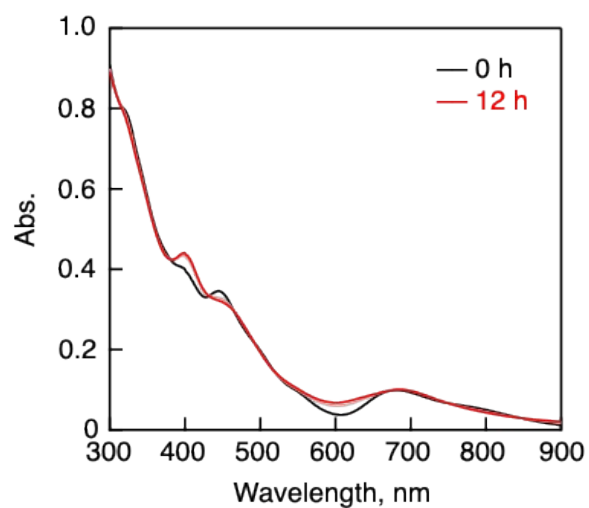

**Fig. S10.** UV-vis spectral changes of  $\text{TOA}^+[\text{Au}_{25}(\text{SC}_2\text{Ph})_{18}]^-$  (0.010 mM) in THF under air in the presence of TFA (0.050 mM) at 298 K.

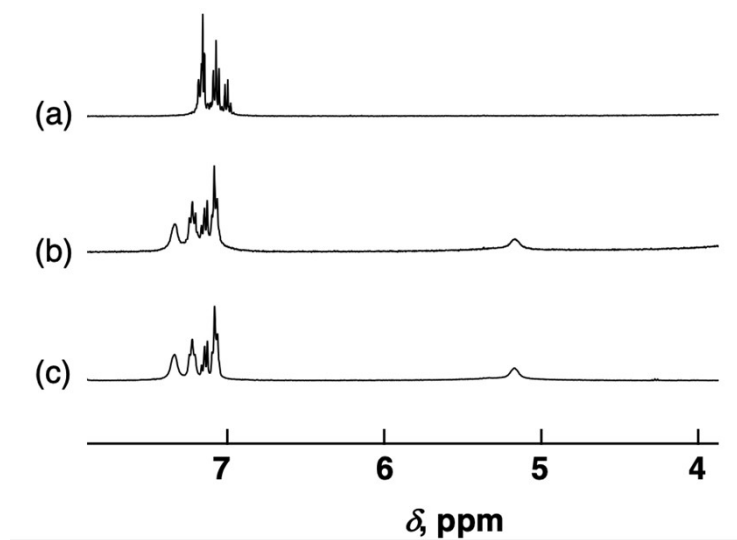

**Fig. S11.**  $^1\text{H}$  NMR spectra of (a)  $\text{TOA}^+[\text{Au}_{25}(\text{SC}_2\text{Ph})_{18}]^-$ , (b)  $\text{TOA}^+[\text{Au}_{25}(\text{SC}_2\text{Ph})_{18}]^-$  (0.10 mM) with TFA (2.0 mM) and (c) authentic  $[\text{Au}_{25}(\text{SC}_2\text{Ph})_{18}]^0$  in  $\text{THF}-d_8$ .  $[\text{Au}_{25}(\text{SC}_2\text{Ph})_{18}]^0$  was prepared according to the previous report.<sup>10</sup>

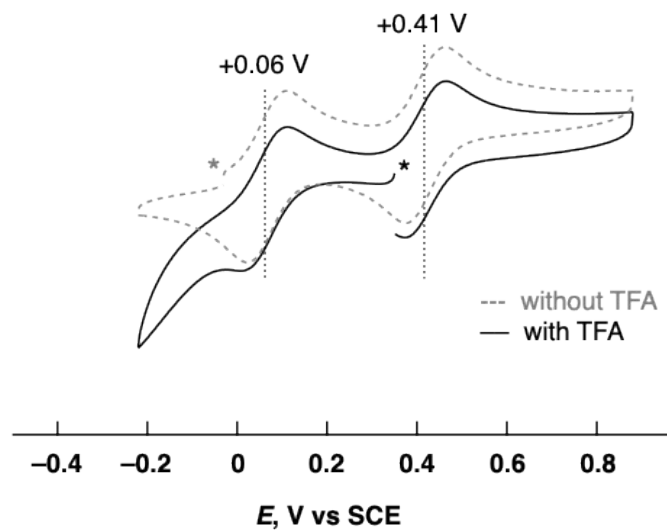

**Fig. S12.** Comparison of cyclic voltammograms of  $\text{TOA}^+[\text{Au}_{25}(\text{SC}_2\text{Ph})_{18}]^-$  (0.33 mM) with (2.0 mM, solid line) and without TFA (dotted line) in THF containing 0.1 M  $\text{TBAPF}_6$  as an electrolyte. Asterisks indicate the open circuit potential of each voltammogram.

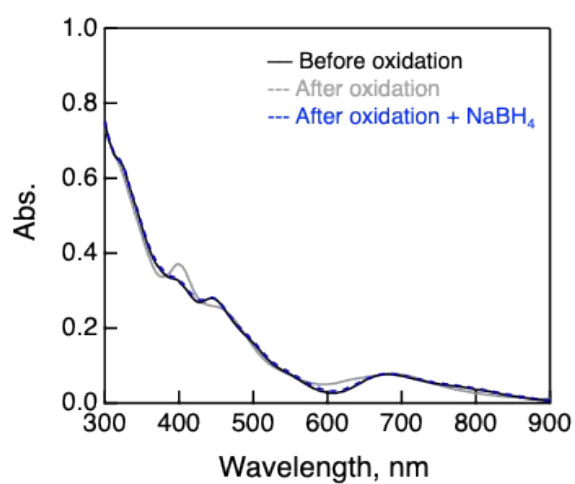

**Fig. S13.** UV-vis spectra of  $\text{TOA}^+[\text{Au}_{25}(\text{SC}_2\text{Ph})_{18}]^-$  (0.010 mM) in THF. Black solid line: before adding TFA; Gray dotted line: after oxidation to form  $[\text{Au}_{25}(\text{SC}_2\text{Ph})_{18}]^0$  in the presence of TFA (0.50 mM); Blue dotted line; Addition of  $\text{NaBH}_4$  to the solution after oxidation reaction of  $\text{TOA}^+[\text{Au}_{25}(\text{SC}_2\text{Ph})_{18}]^-$ .

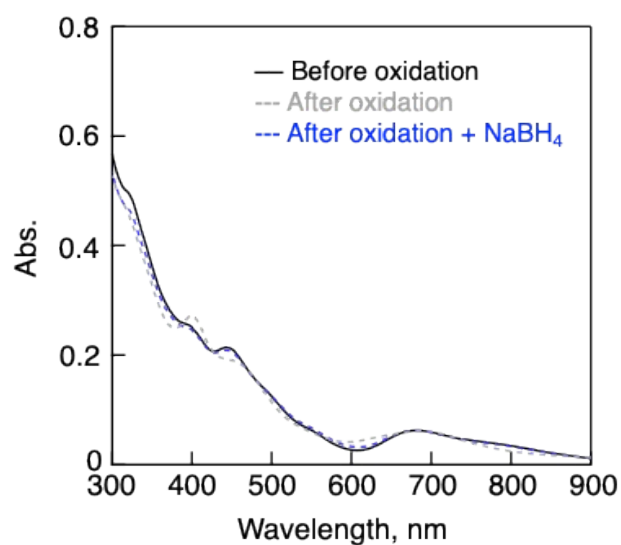

**Fig. S14.** UV-vis spectra of  $\text{TOA}^+[\text{Au}_{25}(\text{SC}_2\text{Ph})_{18}]^-$  (0.010 mM) in THF. Black solid line: before adding TFA; Gray dotted line: after oxidation to form  $[\text{Au}_{25}(\text{SC}_2\text{Ph})_{18}]^0$  in the presence of high concentration of TFA (10 mM); Blue dotted line; Addition of  $\text{NaBH}_4$  to the solution after oxidation reaction of  $\text{TOA}^+[\text{Au}_{25}(\text{SC}_2\text{Ph})_{18}]^-$ .

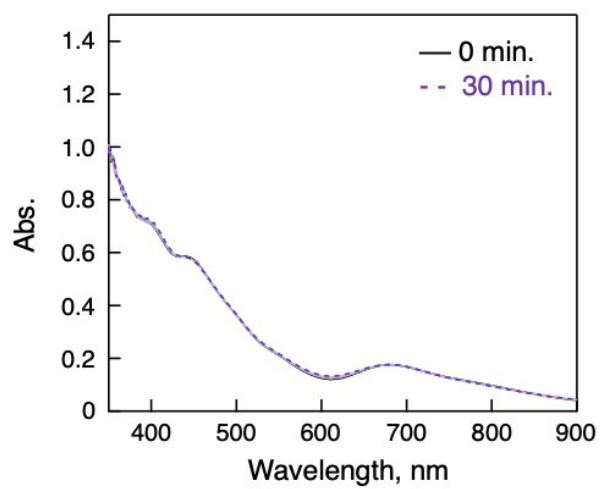

**Fig. S15.** UV-vis spectral change of  $\text{TOA}^+[\text{Au}_{25}(\text{SC}_2\text{Ph})_{18}]^-$  (0.010 mM) in degassed THF in the presence of TFA (0.50 mM).

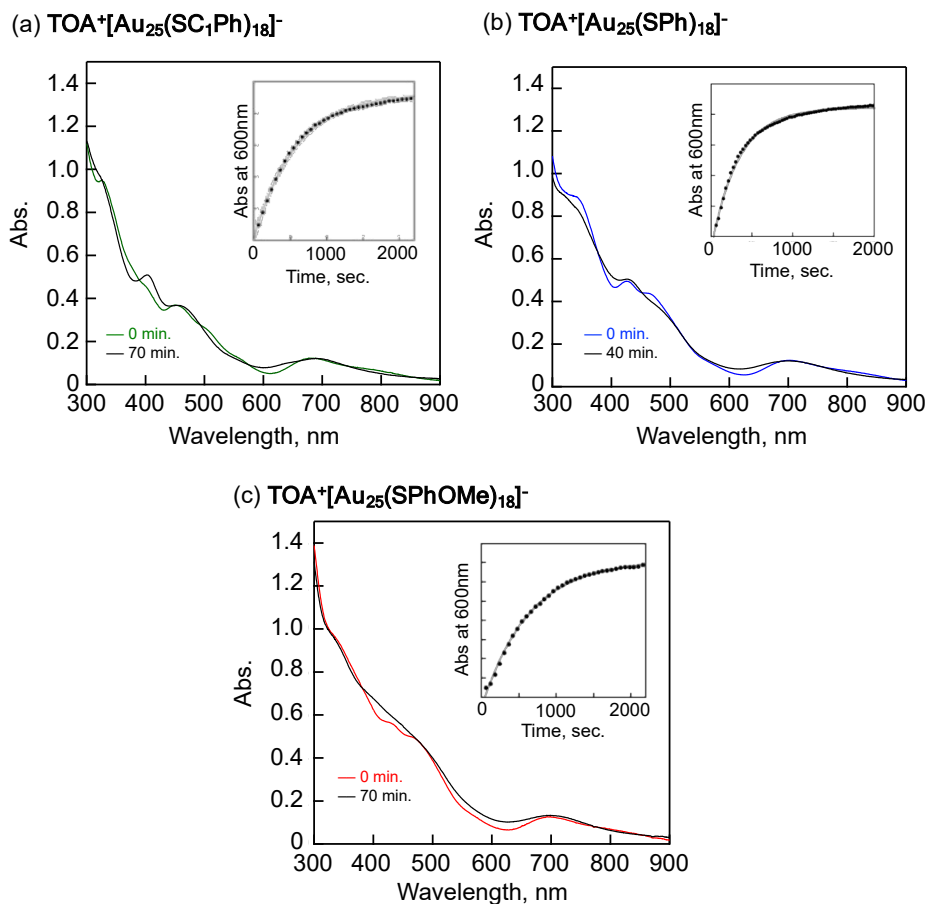

**Fig. S16.** Time-course UV-vis spectral change of  $\text{TOA}^+[\text{Au}_{25}(\text{SR})_{18}]^-$  (0.010 mM) in THF containing TFA. Inset: The time profile of absorbance at 600 nm. (a)  $\text{TOA}^+[\text{Au}_{25}(\text{SC}_1\text{Ph})_{18}]^-$  with TFA (0.50 mM), (b)  $\text{TOA}^+[\text{Au}_{25}(\text{SPh})_{18}]^-$  with TFA (2.0 mM) and (c)  $\text{TOA}^+[\text{Au}_{25}(\text{SPhOMe})_{18}]^-$  (0.50 mM).

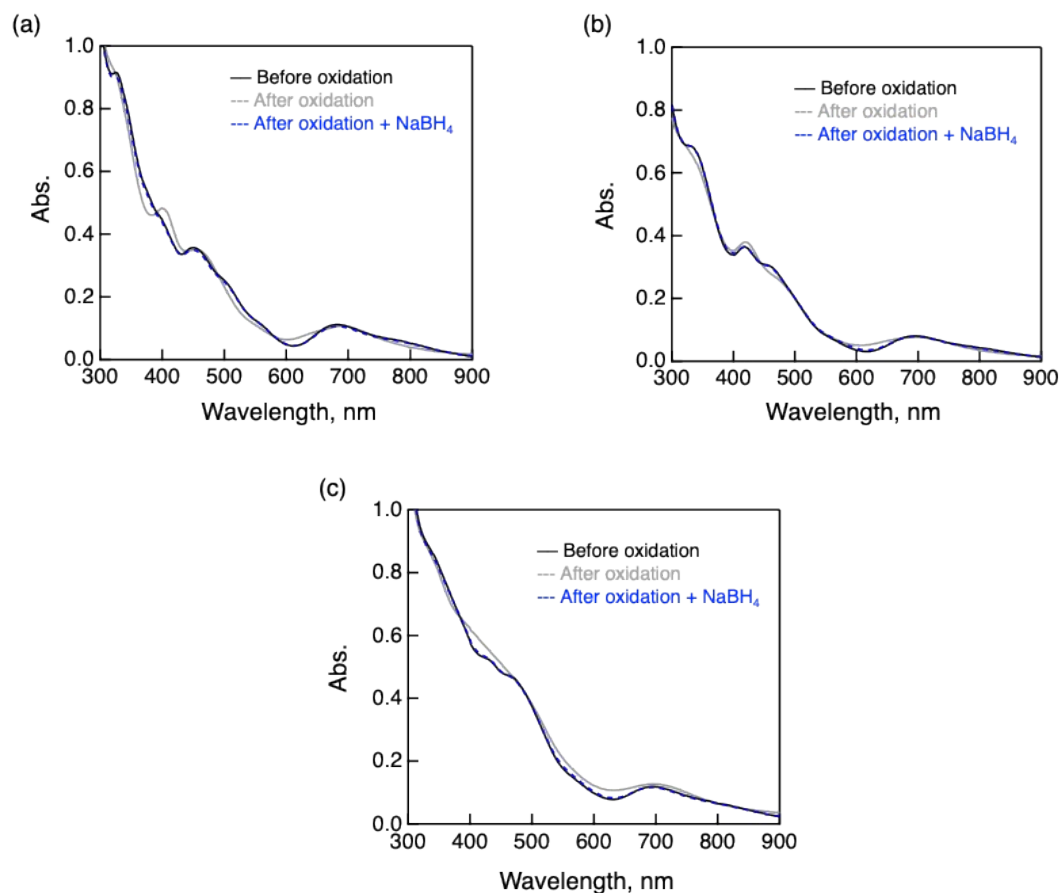

**Fig. S17.** UV-vis spectra of  $\text{TOA}^+[\text{Au}_{25}(\text{SR})_{18}]^-$  (0.010 mM) in THF. **SR** = (a) **SC<sub>1</sub>Ph**, (b) **SPh**, and (c) **SPhOMe**. Black solid line: before adding TFA; Gray dotted line: after oxidation to form  $[\text{Au}_{25}(\text{SR})_{18}]^0$  in the presence of TFA (0.50 mM); Blue dotted line; Addition of  $\text{NaBH}_4$  to the solution after oxidation reaction of  $\text{TOA}^+[\text{Au}_{25}(\text{SR})_{18}]^-$ .

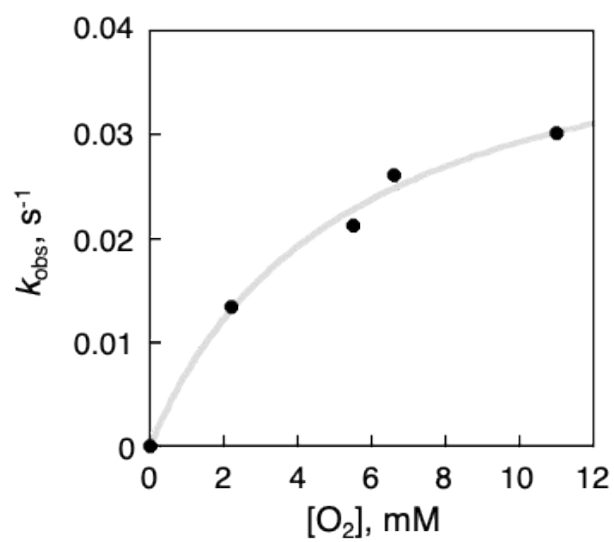

**Fig. S18.** [O<sub>2</sub>] dependence of  $k_{\text{obs}}$  in the oxidation reaction of  $\text{TOA}^+[\text{Au}_{25}(\text{SC}_2\text{Ph})_{18}]^-$  in THF ([TFA] = 2.0 mM) at 298 K.

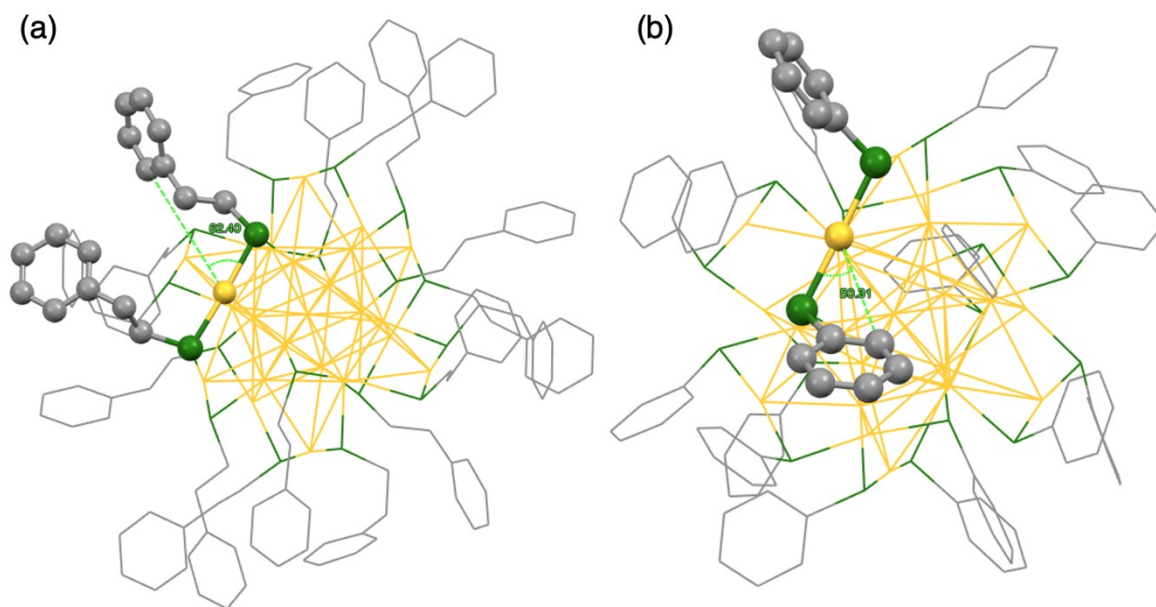

**Fig. S19.** Representative cone half angle of (a)  $[\text{Au}_{25}(\text{SC}_2\text{Ph})_{18}]^-$  and (b)  $[\text{Au}_{25}(\text{SPh})_{18}]^-$ . Protons were omitted for clarity. The half cone angles ( $\theta$ ) were calculated as the averaged values of 24 C-Au-S angles in single crystallographic data of  $[\text{Au}_{25}(\text{SR})_{18}]^-$ . Atom labels: Yellow: gold, Green: sulfur, Light grey: carbon.

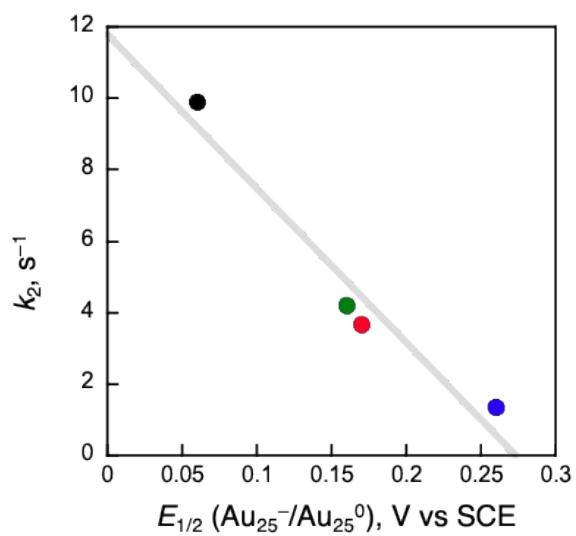

**Fig. S20.** Plot of rate constants ( $k_2$ ) against the first redox potentials ( $E_{1/2} (\text{Au}_{25}^-/\text{Au}_{25}^0)$ ) of  $\text{TOA}^+[\text{Au}_{25}(\text{SR})_{18}]^-$ . SR = SC<sub>2</sub>Ph (black), SC<sub>1</sub>Ph (green), SPhOMe (red) and SPh (blue).

**Table S1.** Structural parameters of  $\text{TOA}^+[\text{Au}_{25}(\text{SR})_{18}]^-$  obtained by curve-fitting analysis of Au  $L_3$ -edge EXAFS spectra.

| $[\text{Au}_{25}(\text{SR})_{18}]^-$            | Bond  | CN       | $r$ , Å | DW ( $\sigma^2$ ), Å <sup>2</sup> | $R$ , % |
|-------------------------------------------------|-------|----------|---------|-----------------------------------|---------|
| $[\text{Au}_{25}(\text{SC}_2\text{Ph})_{18}]^-$ | Au-S  | 1.40(18) | 2.31(3) | 0.0030(24)                        | 13.7    |
|                                                 | Au-Au | 1.63(15) | 2.78(2) | 0.0031(13)                        |         |
|                                                 | Au-Au | 1.27(17) | 2.94(2) | 0.0035(18)                        |         |
| $[\text{Au}_{25}(\text{SC}_1\text{Ph})_{18}]^-$ | Au-S  | 1.40(18) | 2.32(3) | 0.0030(23)                        | 14.7    |
|                                                 | Au-Au | 1.59(15) | 2.78(2) | 0.0030(13)                        |         |
|                                                 | Au-Au | 1.2(2)   | 2.92(3) | 0.0042(23)                        |         |
| $[\text{Au}_{25}(\text{SPh})_{18}]^-$           | Au-S  | 1.39(19) | 2.31(3) | 0.0036(28)                        | 10.4    |
|                                                 | Au-Au | 1.54(17) | 2.78(2) | 0.0037(16)                        |         |
|                                                 | Au-Au | 1.2(2)   | 2.89(5) | 0.0064(39)                        |         |
| $[\text{Au}_{25}(\text{SPhOMe})_{18}]^-$        | Au-S  | 1.36(19) | 2.32(3) | 0.0036(28)                        | 12.3    |
|                                                 | Au-Au | 1.75(18) | 2.79(2) | 0.0038(16)                        |         |
|                                                 | Au-Au | 1.2(2)   | 2.90(4) | 0.0053(30)                        |         |

**Table S2.** Comparison of structural parameters of  $\text{TOA}^+[\text{Au}_{25}(\text{SPh})_{18}]^-$  obtained by single-crystal X-ray diffraction analysis with previously reported  $\text{TOA}^+[\text{Au}_{25}(\text{SC}_2\text{Ph})_{18}]^-$ <sup>11</sup>

|                                                                                                                                  | $\text{TOA}^+[\text{Au}_{25}(\text{SC}_2\text{Ph})_{18}]^-$ | $\text{TOA}^+[\text{Au}_{25}(\text{SPh})_{18}]^-$ |
|----------------------------------------------------------------------------------------------------------------------------------|-------------------------------------------------------------|---------------------------------------------------|
| $\text{Au}-\text{Au}_{\text{core}}, \text{\AA}$                                                                                  | 2.776                                                       | 2.782                                             |
| $\text{Au}-\text{Au}_{\text{surface}}, \text{\AA}$                                                                               | 2.919                                                       | 2.926                                             |
| $\text{Au}_{\text{staple}}-\text{S}_{\text{core}}, \text{\AA}$<br>$\text{Au}_{\text{staple}}-\text{S}_{\text{apex}}, \text{\AA}$ | 2.30                                                        | 2.30                                              |
| $\text{Au}_{\text{surface}}-\text{S}_{\text{core}}, \text{\AA}$                                                                  | 2.39                                                        | 2.40                                              |

The bond distances are described as averaged values.

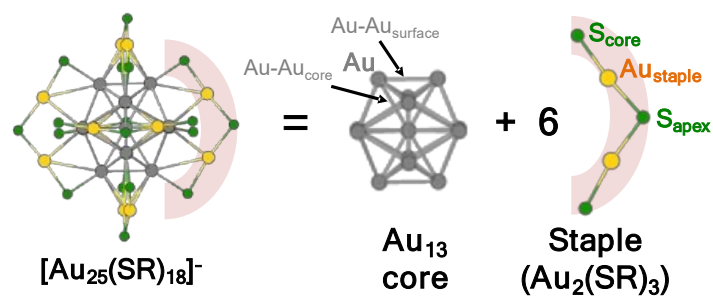

**Table S3.** X-ray crystallographic data for  $\text{TOA}^+[\text{Au}_{25}(\text{SPh})_{18}]^-$ .

|                            |                                                                   |
|----------------------------|-------------------------------------------------------------------|
| crystal system             | Triclinic                                                         |
| space group                | $P \bar{1}$ (#2)                                                  |
| $T$ , K                    | 90(2)                                                             |
| formula                    | $\text{C}_{147.35}\text{H}_{170.12}\text{Au}_{25}\text{NOS}_{18}$ |
| FW                         | 7472.46                                                           |
| $a$ , Å                    | 17.0841(8)                                                        |
| $b$ , Å                    | 20.5511(10)                                                       |
| $c$ , Å                    | 26.5333(12)                                                       |
| $\alpha$ , deg             | 73.391(2)                                                         |
| $\beta$ , deg              | 72.258(2)                                                         |
| $\gamma$ , deg             | 65.634(2)                                                         |
| $V$ , Å <sup>3</sup>       | 7943.6(7)                                                         |
| $Z$                        | 2                                                                 |
| $\lambda$ , Å              | 0.71073<br>(Mo $K\alpha$ )                                        |
| $D_c$ , g cm <sup>-3</sup> | 3.124                                                             |
| reflns measured            | 193152                                                            |
| reflns unique              | 36399                                                             |
| $R_1$ ( $I > 2\sigma(I)$ ) | 0.0306                                                            |
| $wR_2$ (all)               | 0.0704                                                            |
| GOF                        | 1.034                                                             |

## References

1. J. F. Parker, J. E. F. Weaver, F. McCallum, C. A. Fields-Zinna, R. W. Murray, *Langmuir*, 2010, **26**(16), 13650-13654.
2. A. Das, T. Li, K. Nobusada, C. Zeng, N. L. Rosi, R. Jin, *J. Am. Chem. Soc.*, 2013, **135**(49), 18264-18267.
3. G. M. Sheldrick, *Acta Cryst.*, 2015, **A71**, 3.
4. G. M. Sheldrick, *Acta Cryst.*, 2015, **C71**, 3.
5. C. Kabuto, S. Akine, S. E. Kwon, *J. Cryst. Soc. Jpn.*, 2009, **51**, 218.
6. O. V. Dolomanov, L. J. Bourhis, R. J. Gildea, J. A. K. Howard, H. Puschmann, *J. Appl. Cryst.* 2009, **42**, 339.
7. W. Suzuki, H. Kotani, T. Ishizuka, T. Kojima, *J. Am. Chem. Soc.* 2019, **141**, 5987-5994.
8. N. G. Connelly, W. E. Geiger, *Chem. Rev.* 1996, **96**, 877-910.
9. H. Asakura, S. Yamazoe, T. Misumi, A. Fujita, T. Tsukuda, T. Tanaka, *Radiat. Phys. Chem.*, 2020, **175**, 108270.
10. M. A. Tofanelli, K. Salorinne, T. W. Ni, S. Malola, B. Newell, B. Phillips, H. Häkkinen, C. J. Ackerson, *Chem. Sci.* 2016, **7**, 1882.
11. M. Zhu, C. M. Aikens, F. J. Hollander, G. C. Schatz, R. Jin, *J. Am. Chem. Soc.*, 2008, **130**, 5883-5885.
